# Supplementary material
Source: PubMed Central journal article supplement (PMC3494271)
Supplement: supp_mss182_Accession_numbers.pdf [file supp_mss182_Accession_numbers.pdf]

## Phylogenetic Analyses

### T-type Ca<sub>v</sub>

|                |                |                   |
|----------------|----------------|-------------------|
| Homo           | O95180.4       | Swiss-Prot        |
| Ciona          | 269719         | JGI-Genome Portal |
| Helobdella     | 66349          | JGI-Genome Portal |
| Drosophila     | NM_001103419.1 | NR Protein        |
| Caenorhabditis | WP:CE36117     | WormBase          |
| Trichoplax     | 21513          | JGI-Genome Portal |

### L-type Ca<sub>v</sub>

|                    |              |                   |
|--------------------|--------------|-------------------|
| Oryctolagus        | P15381.1     | Swiss-Prot        |
| Ciona              | 239620       | JGI-Genome Portal |
| Helobdella         | 128998       | JGI-Genome Portal |
| Caenorhabditis     | WP:CE31165   | WormBase          |
| Drosophila         | NM_080365.2  | NR Protein        |
| Strongylocentrotus | GLEAN3_07770 | SpBase            |
| Nematostella       | 88037        | JGI-Genome Portal |
| Stylophora         | AAD11470.1   | NR Protein        |
| Cyanea             | AAC63050.1   | NR Protein        |
| Trichoplax         | 18642        | JGI-Genome Portal |

### N/P/Q-type Ca<sub>v</sub>

|                    |              |            |
|--------------------|--------------|------------|
| Homo P/Q           | O00555.2     | Swiss-Prot |
| Homo N             | O55017.1     | Swiss-Prot |
| Strongylocentrotus | GLEAN3_11692 | SpBase     |
| Schistosoma        | AAK84313.1   | NR Protein |
| Caenorhabditis     | WP:CE31225   | WormBase   |
| Mnemiopsis         | JF905561     | NR Protein |

### Other Ca<sub>v</sub>

|             |              |                             |
|-------------|--------------|-----------------------------|
| Amphimedon  | 228755       | Metazome                    |
| Salpingoeca | PTSG_09464.1 | Origins of Multicellularity |

### Non-Opisthokont Four-Domain Channels

|                |                |                   |
|----------------|----------------|-------------------|
| Micromonas     | XP_003062007.1 | NR Protein        |
| Chlamydomonas  | XP_001701475.1 | NR Protein        |
| Volvox         | XP_002954479.1 | NR Protein        |
| Ectocarpus     | CBJ26318.1     | NR Protein        |
| Thalassiosira  | XP_002289136.1 | NR Protein        |
| Phytophthora 1 | 574424         | JGI Genome Portal |
| Phytophthora 2 | 539928         | JGI Genome Portal |
| Paramecium     | XP_001445891.1 | NR Protein        |
| Ostreococcus 1 | XP_001415426.1 | NR Protein        |
| Ostreococcus 2 | XP_001418450.1 | NR Protein        |
| Emiliana       | 44890          | JGI Genome Portal |

**Nav**

|                    |              |                             |
|--------------------|--------------|-----------------------------|
| Mus 1.4 Nav1       | NM_133199.2  | NR Protein                  |
| Homo 1.6 Nav1      | NM_014191.2  | NR Protein                  |
| Ciona Nav1         | 249763       | JGI-Genome Portal           |
| Halocynthia Nav1   | 662385       | NR PROTEIN                  |
| Lottia Nav1        | 177540       | JGI-Genome Portal           |
| Helobdella Nav1    | 109965       | JGI-Genome Portal           |
| Drosophila Nav1    | 150421666    | NR PROTEIN                  |
| Halocynthia Nav2   | 8096345      | NR PROTEIN                  |
| Ciona Nav2         | 259743       | JGI-Genome Portal           |
| Strongylocentrotus | GLEAN3_25997 | SpBase                      |
| Lottia Nav2        | 161240       | JGI-Genome Portal           |
| Drosophila Nav2    | 166215092    | NR PROTEIN                  |
| Polyorchis         | 3005564      | NR PROTEIN                  |
| Cyanea             | 994814       | NR PROTEIN                  |
| Nematostella       | 122010       | JGI-Genome Portal           |
| Aiptasia           | 2791840      | NR PROTEIN                  |
| Trichoplax         | 23340        | JGI-Genome Portal           |
| Mnemiopsis         | JF905562     | NR Protein                  |
| Monosiga           | JF827087     | NR Protein                  |
| Salpingoeca        | PTSG_00336.1 | Origins of Multicellularity |

**NALCN**

\* not used in phylogenies.

|                 |                |            |
|-----------------|----------------|------------|
| Homo            | NP_443099.1    | NR Protein |
| Caenorhabditis  | NP_741413.2    | NR Protein |
| Caenorhabditis* | NP_498054.2    | NR Protein |
| Drosophila      | NP_727772.2    | NR Protein |
| Nematostella    | XP_001637238.1 | NR Protein |
| Nematostella*   | XP_001637237.1 | NR Protein |
| Trichoplax      | XP_002107592.1 | NR Protein |
| Amphimedon      | Aqu1.217330    | Spongezome |
| Amphimedon*     | Aqu1.221707    | Spongezome |

**Fungal Calcium Channels**

|               |              |                             |
|---------------|--------------|-----------------------------|
| Saccharomyces | NP_011733.1  | NR Protein                  |
| Aspergillus   | EHA17962.1   | NR Protein                  |
| Phycomyces    | 147120       | JGI-Genome Portal           |
| Mucor         | 147296       | JGI-Genome Portal           |
| Allomyces     | AMAG_07500.2 | Origins of Multicellularity |
